# Supplementary material
Source: publisher site journal article supplement (https://www.dovepress.com/get_supplementary_file.php?f=473385.docx)
Supplement: Supplementary file 1 [file get_supplementary_file.php]

Table S1. univariate regression analyses

|  | OR (95%CL) | P value |
| --- | --- | --- |
| Age | 1.06(1.04~1.07) | <0.001 |
| Gender | 0.69(0.55~0.86) | 0.001 |
| Hypertension | 1.09(0.84~1.42) | 0.53 |
| Diabetes mellitus | 1.29(1.04~1.61 | 0.022 |
| Stroke | 1.68(1.34~2.10) | <0.001 |
| Atrial fibrillation | 3.22(2.30~4.50) | <0.001 |
| Coronary heart disease | 1.58(1.19~2.10) | 0.002 |
| Hyperlipidemia | 0.77(0.47~1.28) | 0.317 |
| Stroking | 0.60(0.46~0.78) | <0.001 |
| Drinking | 0.62(0.46~0.84) | 0.002 |
| TOAST subtypes |  |  |
| Large artery atherosclerosis | ref | <0.001 |
| Small artery occlusion | 0.43(0.34~0.54) | <0.001 |
| Cardiogenic embolism | 2.04(1.21~3.46) | 0.008 |
| Other/undetermined | 0 | 0.999 |
| Admission NIHSS | 1.37(1.32~1.42) | <0.001 |
| WBC | 1.11(1.07~1.16) | <0.001 |
| Neutrophil | 1.20(1.14~1.25) | <0.001 |
| Lymphocyte | 0.59(0.49~0.71) | <0.001 |
| Monocyte | 2.45(1.47~4.09) | 0.001 |
| HDL | 0.98(0.68~1.40) | 0.903 |
| LDL | 0.88(0.78~1.00) | 0.05 |
| Apo A-1 | 0.30(0.19~0.49) | <0.001 |
| Apo B | 1.06(0.72~1.57) | 0.774 |
| TC | 0.89(0.81~0.99) | 0.025 |
| TG | 0.81(0.70~0.93) | 0.002 |
| ALB | 0.90(0.87~0.92) | <0.001 |
| PNI | 0.91(0.89~0.93) | <0.001 |
| Apo B/Apo A-1 ratio | 1.73(1.22~2.45) | 0.002 |
